# Supplementary material for: A study on Li0.33La0.55TiO3 solid electrolyte with high ionic conductivity and its application in flexible all-solid-state batteries
Source: Royal Society of Chemistry journal article supplement (doi:10.1039/d1nr02427b), 2021-01-01
Supplement: d1nr02427b1.pdf [file d1nr02427b1.pdf]

**Supporting information**

**Study on  $\text{Li}_{0.33}\text{La}_{0.55}\text{TiO}_3$  Solid Electrolyte with High Ionic Conductivity  
and Its Application in Flexible All Solid-State Battery**

Feihu Tan,<sup>a</sup> Hua An,<sup>a</sup> Ning Li,<sup>a</sup> Jun Du,<sup>b</sup> and Zhengchun Peng\*<sup>a</sup>

<sup>a</sup> Key Laboratory of Optoelectronic Devices and Systems of Ministry of Education and Guangdong Province, College of Physics and Optoelectronic Engineering Shenzhen University, Shenzhen 518060, China

<sup>b</sup> School of microelectronics, South University of Science and Technology, Shenzhen 518055, China

Corresponding author: zcpeng@szu.edu.cn

Table S1. Volume change rate of some lithium electrodes

| Electrode                               | Volume change rate [%] | DOI                                                                                                                    |
|-----------------------------------------|------------------------|------------------------------------------------------------------------------------------------------------------------|
| $\text{Li}_{0.1}\text{TiO}_2$           | 0-2                    | 10.1002/1521-3757(20010917)113:18<3471::AID-ANGE3471>3.0.CO;2-Y<br>10.1016/j.jpowsour.2013.03.185<br>10.1021/jp412196v |
| $\text{Li}_{0.1}(\text{NCM})\text{O}_2$ | 4-8                    | 10.1039/C9TA03191J<br>10.1021/acsmaterialslett.9b00441<br>10.1021/acsaem.9b01354                                       |
| $\text{Li}_{0.1}\text{Mn}_2\text{O}_4$  | 4-24                   | 10.1016/j.electacta.2017.07.089<br>10.1016/j.electacta.2012.02.032                                                     |
| $\text{SiO}_2$                          | 100-400                | 10.1002/sml.201905430<br>10.1021/acsaem.9b01354                                                                        |
| $\text{Li}_{0.1}\text{CoO}_2$           | 3-10                   | 10.1016/j.measurement.2016.09.023<br>10.1016/j.electacta.2015.12.224                                                   |
| $\text{Li}_{0.1}\text{FeO}_2$           | 2-8                    | 10.1002/adfm.201902822<br>10.1016/S0378-7753(03)00152-6                                                                |

Table S2. Ionic conductivity of LLTO thin film electrolytes

|   | journal                                 | ionic conductivity         | DOI                             |
|---|-----------------------------------------|----------------------------|---------------------------------|
| 1 | Journal of The Electrochemical Society  | $3.8 \times 10^{-5}$ S/cm  | 10.1149/2.006404jes/meta        |
| 2 | Advanced materials                      | $2.0 \times 10^{-5}$ S/cm  | 10.1002/adma.201906221          |
| 3 | Solid State Ionics                      | $7.27 \times 10^{-6}$ S/cm | 10.1016/j.ssi.2019.115032       |
| 4 | Solid State Ionics                      | $0.96 \times 10^{-6}$ S/cm | 10.1016/j.ssi.2018.07.005       |
| 5 | Electrochimica Acta                     | $1.1 \times 10^{-5}$ S/cm  | 10.1016/j.electacta.2004.02.065 |
| 6 | Journal of Alloys and Compounds         | $5.25 \times 10^{-5}$ S/cm | 10.1016/j.jallcom.2010.10.086   |
| 7 | Journal of The Electrochemical Society  | $3.0 \times 10^{-4}$ S/cm  | 10.1149/2.0411701jes/meta       |
| 8 | Electrochemical and Solid-State Letters | $2.0 \times 10^{-5}$ S/cm  | 10.1149/1.1843571/meta          |

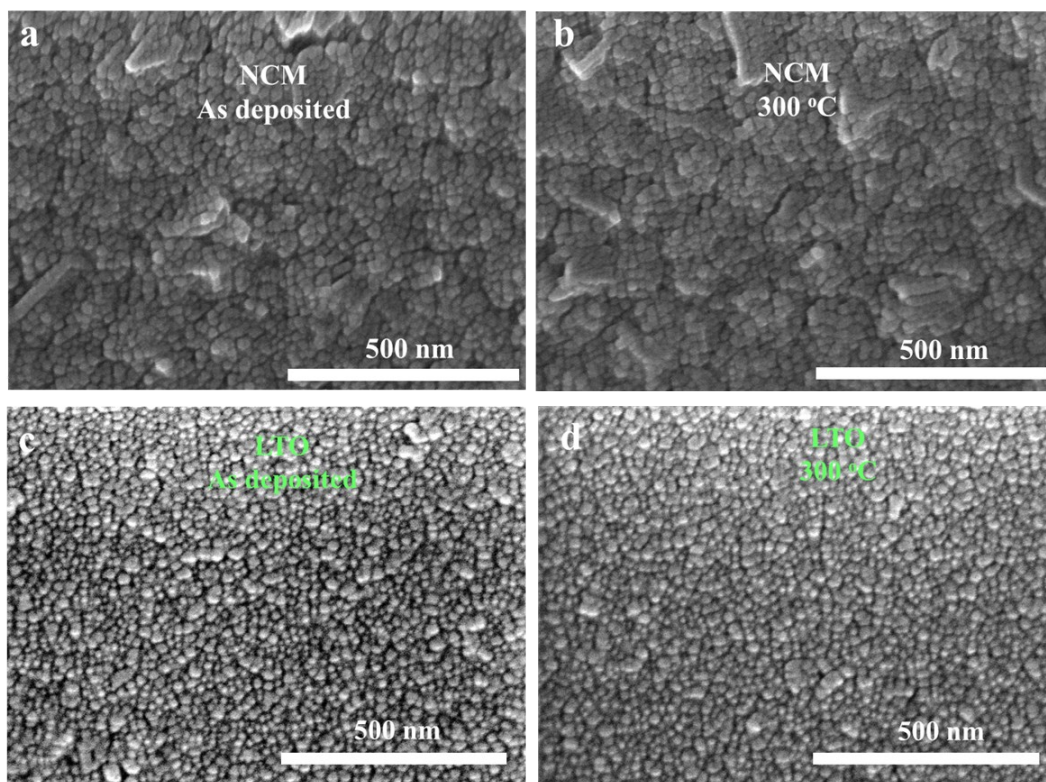

Figure S1. SEM image of (a) as deposited NCM (b) NCM annealed at 300 °C (c) as deposited LTO (d) LTO annealed at 300 °C
